# Supplementary material
Source: Springer Nature journal article supplement (https://www.springermedizin.de/resource/supplementary/12936_2014_3278_MOESM7_ESM.pdf/9545484)
Supplement: MOESM7 [file 9545484]

*Interpretation RDT*

|               | <b>Selection patients / tests</b> | <b>Selection CHWs</b> | <b>Index test</b> | <b>Reference standard</b> | <b>Time bias</b> | <b>Missing data</b> |                                             |
|---------------|-----------------------------------|-----------------------|-------------------|---------------------------|------------------|---------------------|---------------------------------------------|
| Counihan 2012 | ?                                 | +                     | +                 | ?                         | +                | +                   | 63, 61 and 59 CHWs reading 1 RDT            |
| Mukanga 2011  | +                                 | +                     | +                 | ?                         | +                | +                   | 182 RDTs                                    |
| Harvey 2008   | ?                                 | -                     | +                 | ?                         | +                | +                   | 32, 21 and 26 RDTs (1 per CHW)              |
| Hawkes 2009   | ?                                 | +                     | +                 | ?                         | +                | +                   | 10 CHWs, number of RDT observations unclear |
| Mubi 2011     | +                                 | +                     | +                 | -                         | -                | +                   | 722 RDT positives                           |
